# Supplementary material for: Novel Zinc(II) Complexes of Heterocyclic Ligands as Antimicrobial Agents: Synthesis, Characterisation, and Antimicrobial Studies
Source: Hindawi journal article supplement (doi:10.1155/2014/276598), 2014-01-01
Supplement: f1 [file 276598.f1.pdf]

## Supporting information

### Novel Zinc (II) complexes of heterocyclic ligands as antimicrobial agents: Synthesis, characterisation and antimicrobial studies

Ramesh S. Yamgar<sup>1</sup>, Y. Nivid<sup>2</sup>, Satish Nalawade<sup>2</sup>, Mustapha Mandewale<sup>2</sup>, R. G. Atram<sup>2</sup> and Sudhir S. Sawant<sup>2\*</sup>

<sup>1</sup>Department of Chemistry, Chikitsak Samuha's Patkar-Varde College of Arts, Science and Commerce, Goregaon (W), Mumbai 400 062, INDIA.

<sup>2</sup> P. G. Dept of Chemistry, Govt. of Maharashtra, Ismail Yusuf Arts, Science and Commerce College, Jogeshwari (East), Mumbai 400 060 INDIA

\*Corresponding author: Tel +91 9963476797 e-mail: sawantsudhir@hotmail.com

| No. | Contents                                                                                       | Pg No. |
|-----|------------------------------------------------------------------------------------------------|--------|
| 1   | Figure S1 MS Spectrum of NMAPIMHMC Schiff base                                                 | 3      |
| 2   | FigureS2 <sup>1</sup> H NMR spectrum of [Zn(NMAPIMHMC) <sub>2</sub> ].2H <sub>2</sub> O        | 3      |
| 3   | Figure S3 <sup>13</sup> C NMR spectrum of [Zn(NMAPIMHMC) <sub>2</sub> ].2H <sub>2</sub> O      | 4      |
| 4   | Figure S4 <sup>13</sup> C NMR DEPT spectrum of [Zn(NMAPIMHMC) <sub>2</sub> ].2H <sub>2</sub> O | 4      |
| 5   | Figure S5 MS of Zn(NMAPIMHMC)2.2H <sub>2</sub> O full scan                                     | 5      |
| 6   | Figure S6 MS-MS of Zn(NMAPIMHMC)2.2H <sub>2</sub> O Parent ion peak                            | 5      |
| 7   | Figure S7 IR Spectrum of Zn(NMAPIMHMC) <sub>2</sub> .2H <sub>2</sub> O                         | 6      |
| 8   | Figure S8 <sup>1</sup> H NMR spectrum of Schiff base TMPIMP                                    | 6      |

|    |                                                                                                                |    |
|----|----------------------------------------------------------------------------------------------------------------|----|
| 9  | Figure S9 Mass spectrum of [Zn(TMPIMP) <sub>2</sub> ].2H <sub>2</sub> O                                        | 7  |
| 10 | Figure S10 <sup>1</sup> H NMR spectrum of [Zn(TMPIMP) <sub>2</sub> ].2H <sub>2</sub> O SS151                   | 7  |
| 11 | Figure S11 <sup>13</sup> C NMR spectrum of [Zn(TMPIMP) <sub>2</sub> ].2H <sub>2</sub> O SS151                  | 8  |
| 12 | Figure S12 <sup>13</sup> C NMR DEPT spectrum of [Zn(TMPIMP) <sub>2</sub> ].2H <sub>2</sub> O SS151             | 9  |
| 13 | Figure S13 IR spectrum of [Zn(TMPIMP) <sub>2</sub> ].2H <sub>2</sub> O SS151                                   | 10 |
| 14 | Figure S14 <sup>1</sup> H NMR Spectrum of Schiff base HBABO                                                    | 10 |
| 15 | Figure S15 MS Spectrum of HBABO Schiff base                                                                    | 11 |
| 16 | Figure S16 IR Spectrum of HBABO Schiff base                                                                    | 11 |
| 17 | Figure S17 <sup>1</sup> H NMR Spectrum of Zn(HBABO) <sub>2</sub> .2H <sub>2</sub> O                            | 12 |
| 18 | Figure S18 <sup>13</sup> C NMR Spectrum of Zn(HBABO) <sub>2</sub> .2H <sub>2</sub> O                           | 13 |
| 19 | Figure S19 <sup>13</sup> C NMR DEPT Spectrum of Zn(HBABO) <sub>2</sub> .2H <sub>2</sub> O                      | 14 |
| 20 | Figure S20 MS Spectrum of Zn(HBABO) <sub>2</sub> .2H <sub>2</sub> O                                            | 15 |
| 21 | Figure S21 IR Spectrum of Zn(HBABO) <sub>2</sub> .2H <sub>2</sub> O                                            | 15 |
| 22 | Figure S22 TGA graph of Zn(NMAPIMHMC) <sub>2</sub> .2H <sub>2</sub> O                                          | 16 |
| 23 | Figure S23 TGA graph of Zn(TMPIMP) <sub>2</sub> .2H <sub>2</sub> O                                             | 17 |
| 24 | Figure S24 Antibacterial activity of [Zn(HBABO) <sub>2</sub> ].2H <sub>2</sub> O against <i>Pseudomonas</i>    | 17 |
| 25 | Figure S25 Antibacterial activity of [Zn(DMAEBIMP) <sub>2</sub> ].2H <sub>2</sub> O against <i>Pseudomonas</i> | 18 |
| 26 | Figure 26 Antibacterial activity of [Zn(NMAPIMHMC) <sub>2</sub> ].2H <sub>2</sub> O against <i>S. aureus</i>   | 18 |
| 27 | Figure S27 Antibacterial activity of [Zn(HBABO) <sub>2</sub> ].2H <sub>2</sub> O against <i>E. Coli</i>        | 18 |

|    |                                                                                                             |    |
|----|-------------------------------------------------------------------------------------------------------------|----|
| 28 | Figure S28 Antifungal activity of [Zn(DMAEBIMP) <sub>2</sub> ].2H <sub>2</sub> O against <i>A.niger</i>     | 19 |
| 29 | Figure S29 Antifungal activity of [Zn(HBABO) <sub>2</sub> ].2H <sub>2</sub> O against <i>A.niger</i>        | 19 |
| 30 | Figure S30 Antifungal activity of [Zn(DMAPIMMTC) <sub>2</sub> ].2H <sub>2</sub> O against <i>Candida a.</i> | 19 |

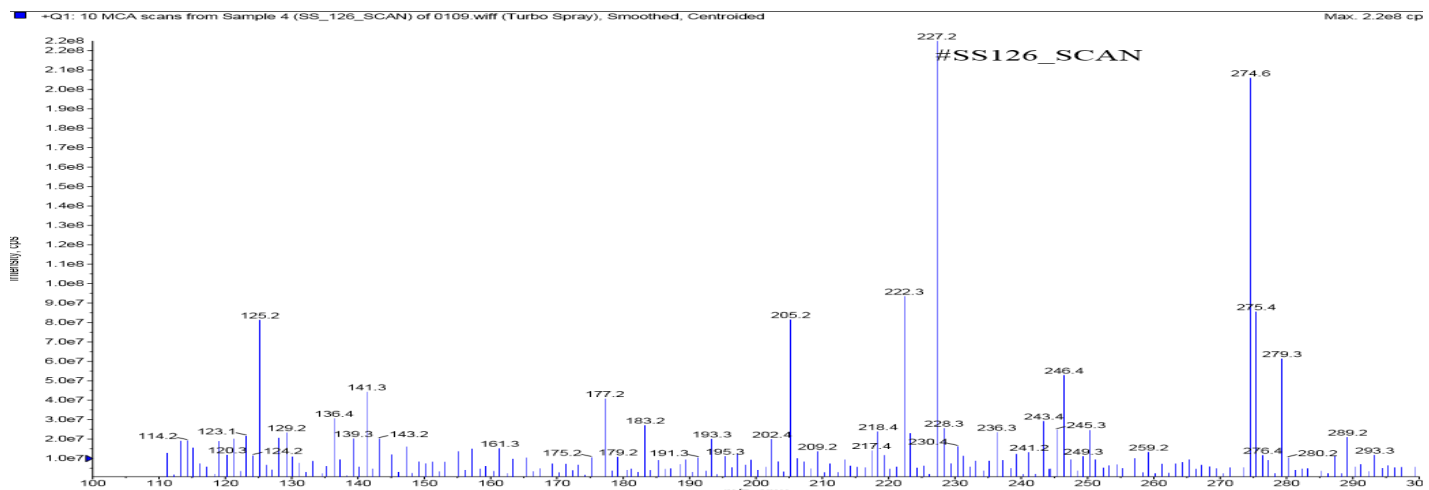

Figure S1 MS Spectrum of NMAPIMHMC Schiff base

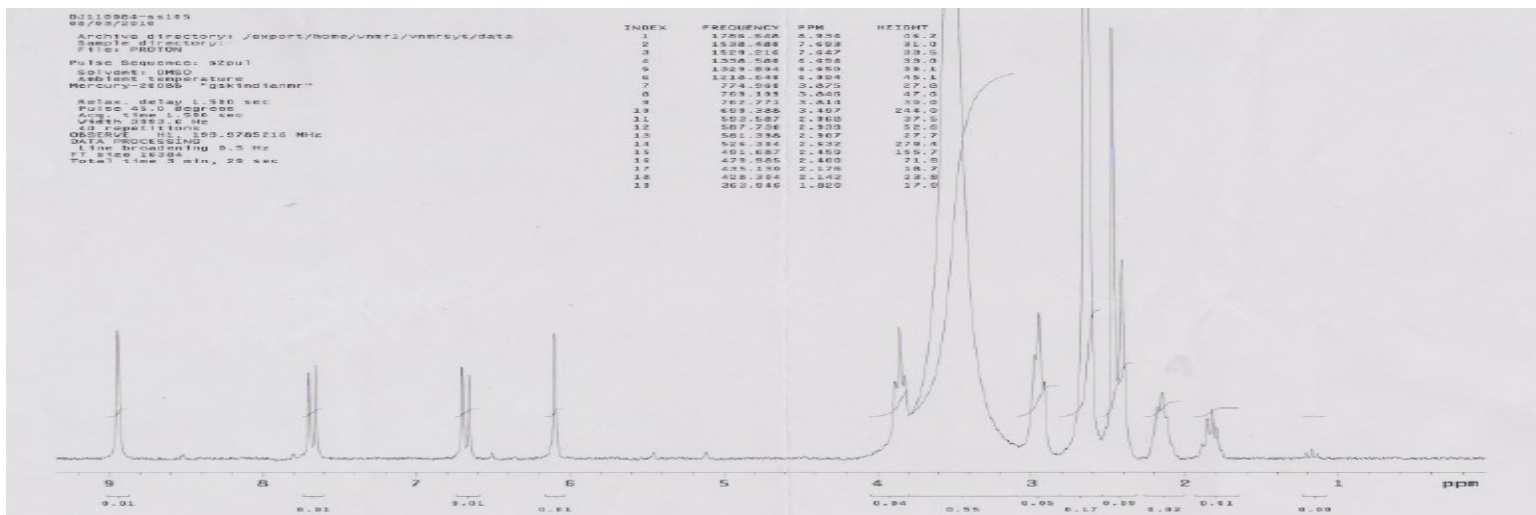

Figure S2 <sup>1</sup>H NMR spectrum of [Zn(NMAPIMHMC)<sub>2</sub>].2H<sub>2</sub>O

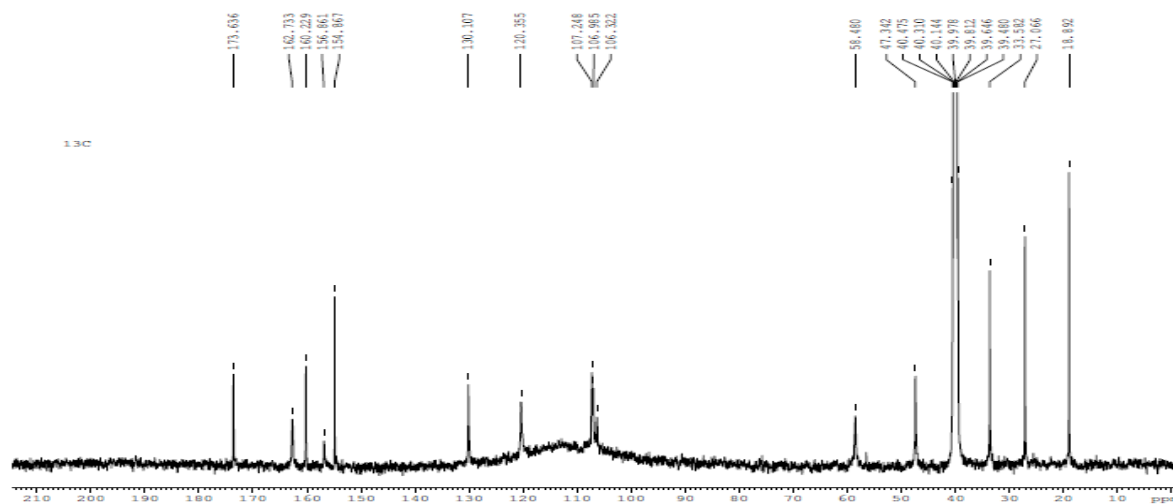

Figure S3 <sup>13</sup>C NMR spectrum of [Zn(NMAPIMHMC)<sub>2</sub>].2H<sub>2</sub>O

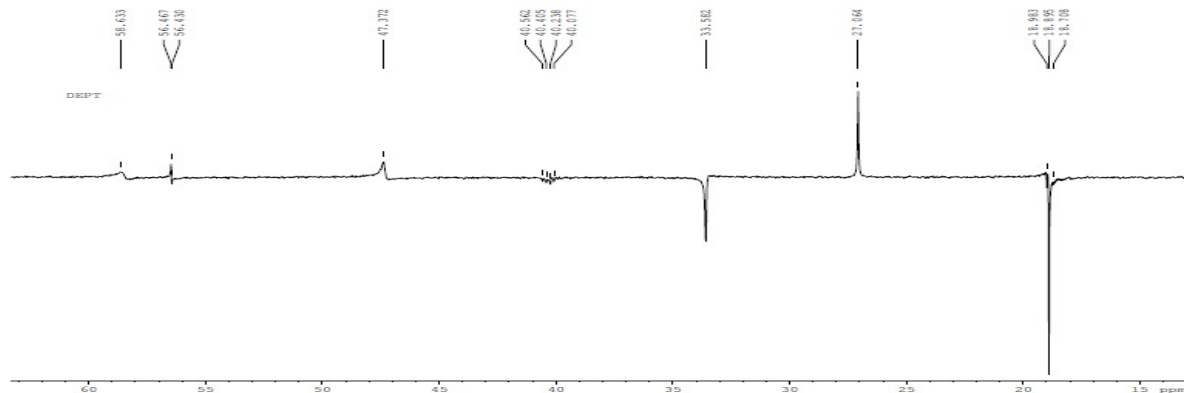

Figure S4  $^{13}\text{C}$  NMR DEPT spectrum of  $[\text{Zn}(\text{NMAPIMHMC})_2] \cdot 2\text{H}_2\text{O}$

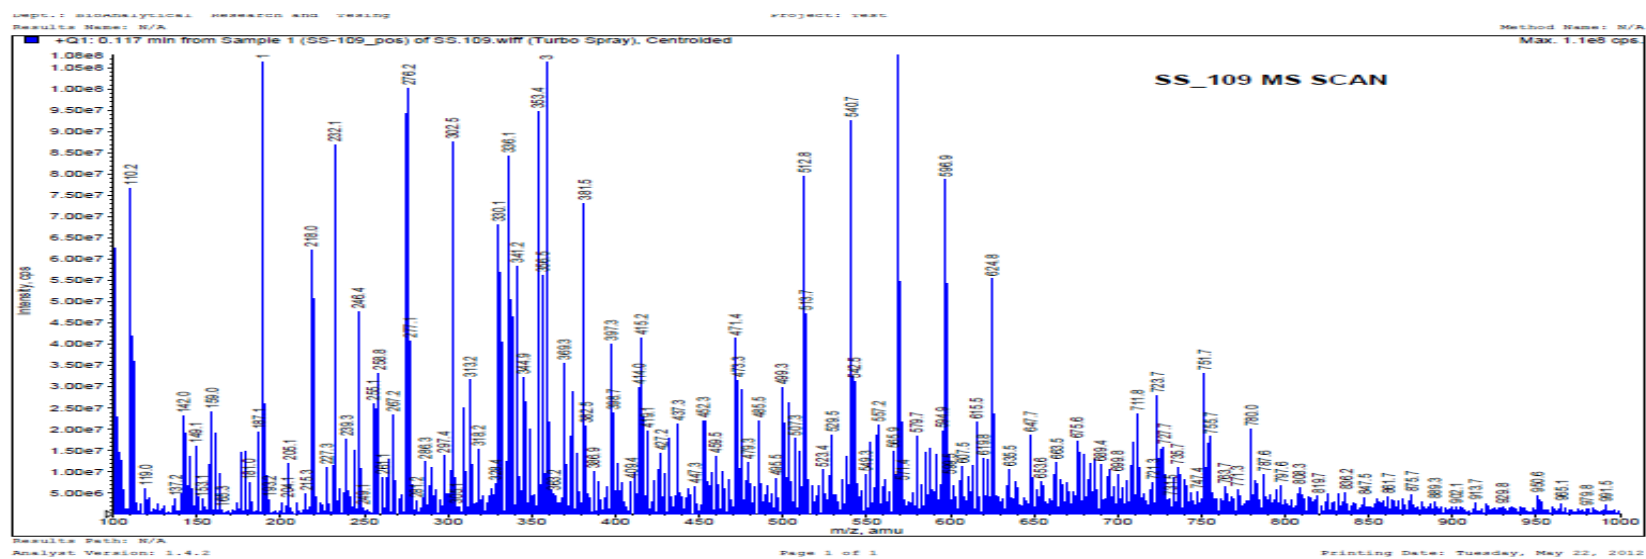

Figure S5 MS of  $\text{Zn}(\text{NMAPIMHMC})_2 \cdot 2\text{H}_2\text{O}$  full scan

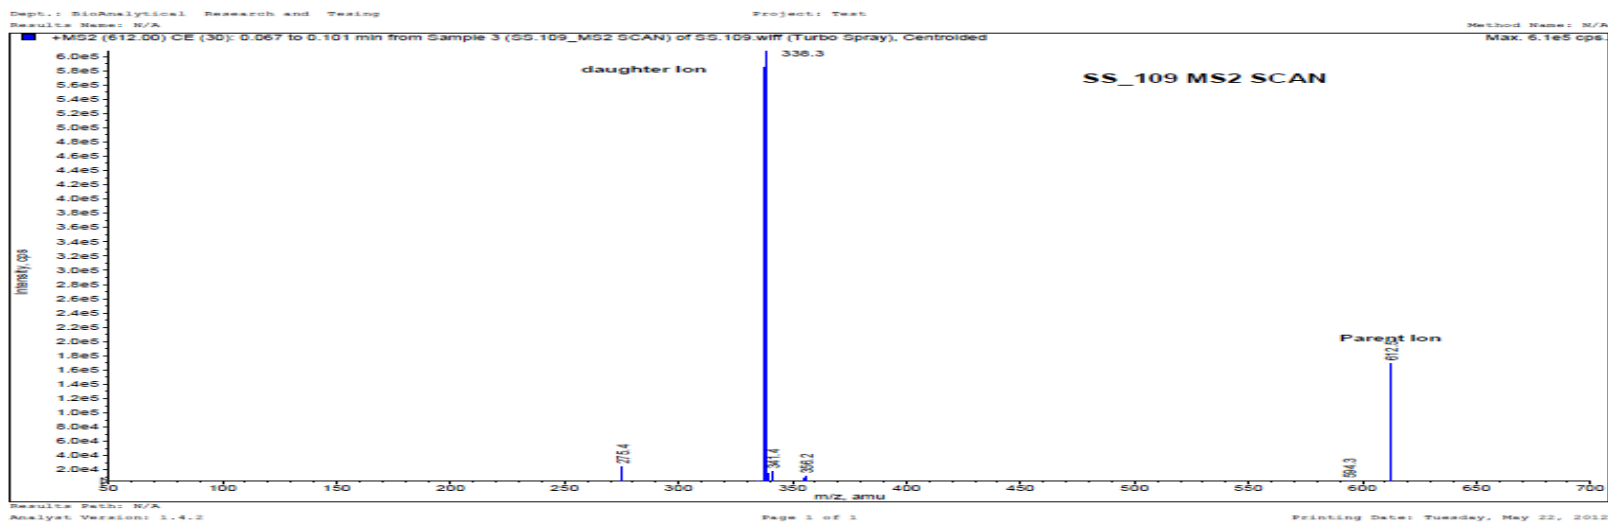

Figure S6 MS-MS of Zn(NMAPIMHMC)<sub>2</sub>·2H<sub>2</sub>O Parent ion peak

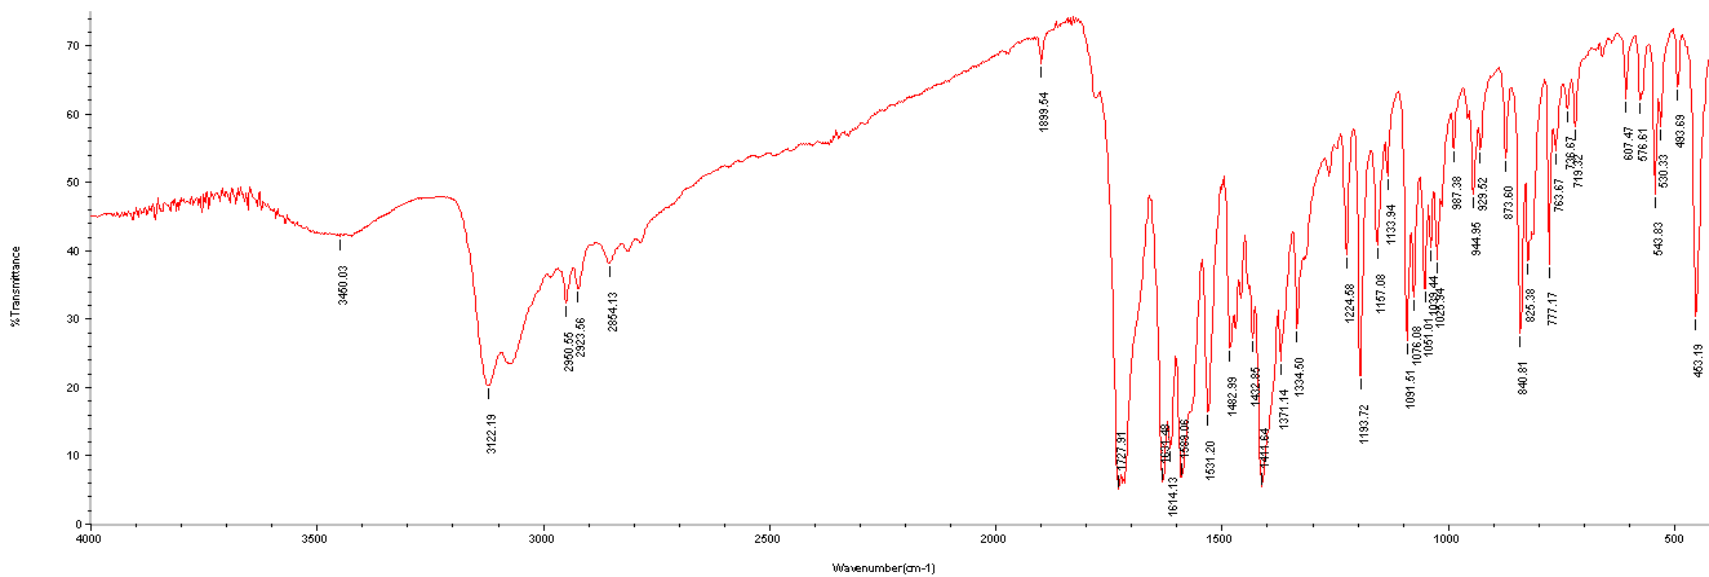

Figure S7 IR Spectrum of Zn(NMAPIMHMC)<sub>2</sub>·2H<sub>2</sub>O

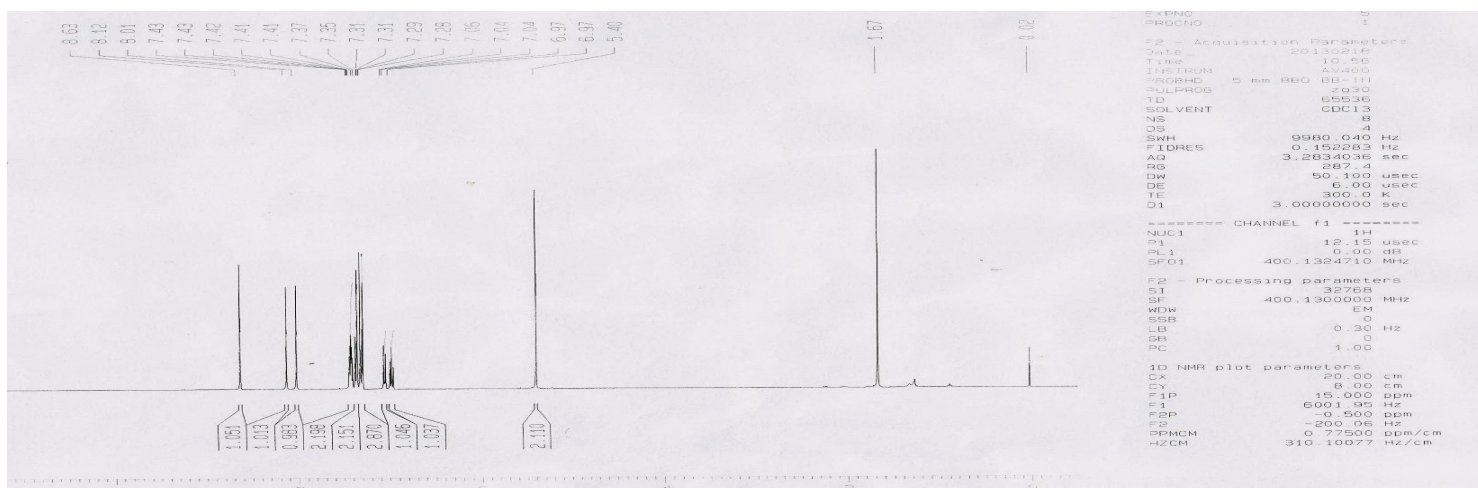

Figure S8 <sup>1</sup>H NMR spectrum of Schiff base TMPIMP

■ +Q1: 0.256 min from Sample 1 (SS151\_Q1MS\_FS(200-800AMU)\_POS) of SS151\_Q1MS\_FS(200-800AMU)\_POS.wiff (Turbo Spray), Centroided

Max. 2.5e6 cps.

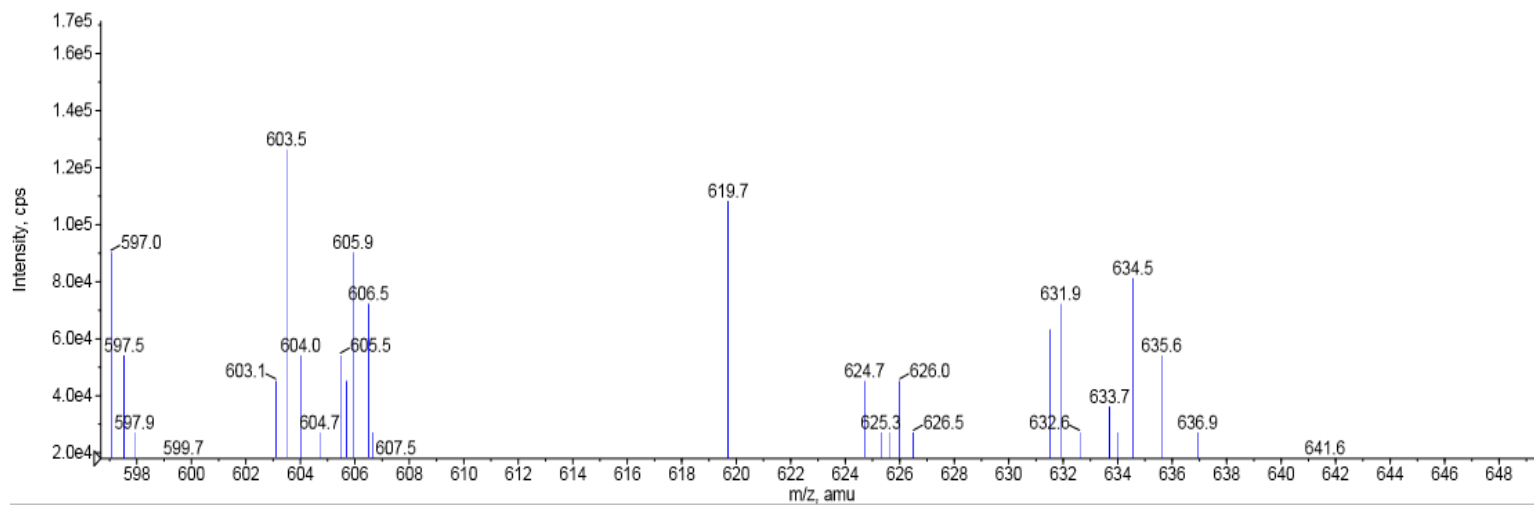

Figure S9 Mass spectrum of [Zn(TMPIMP)<sub>2</sub>].2H<sub>2</sub>O

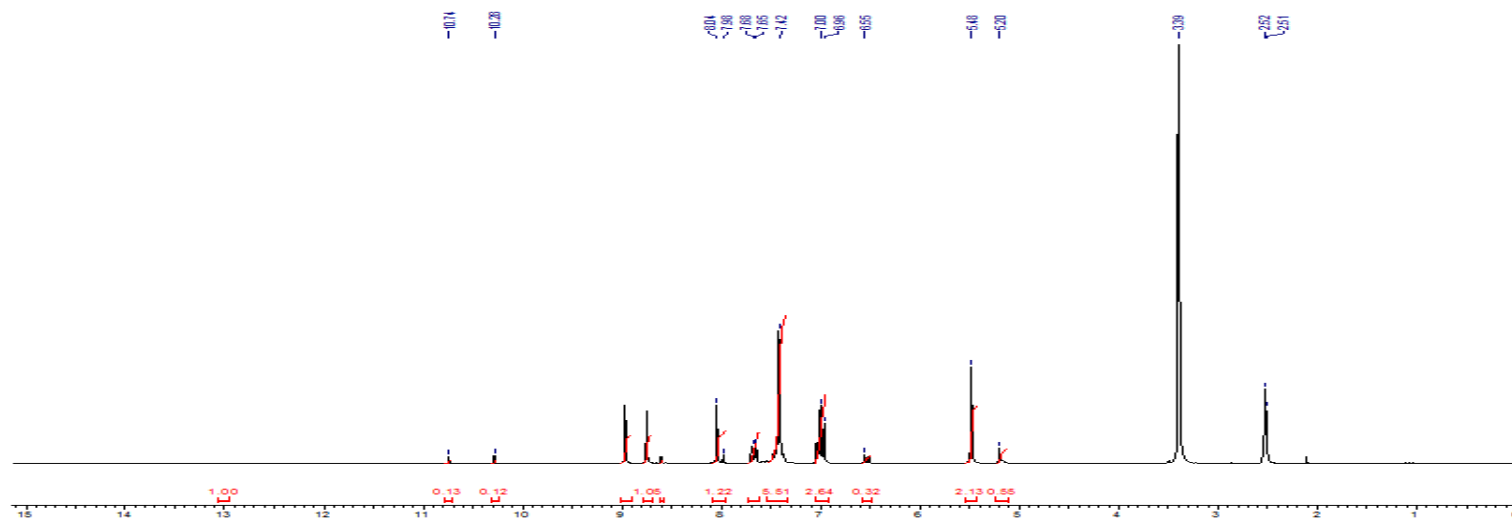

Figure S10  $^1\text{H}$  NMR spectrum of  $[\text{Zn}(\text{TMPIMP})_2]\cdot 2\text{H}_2\text{O}$

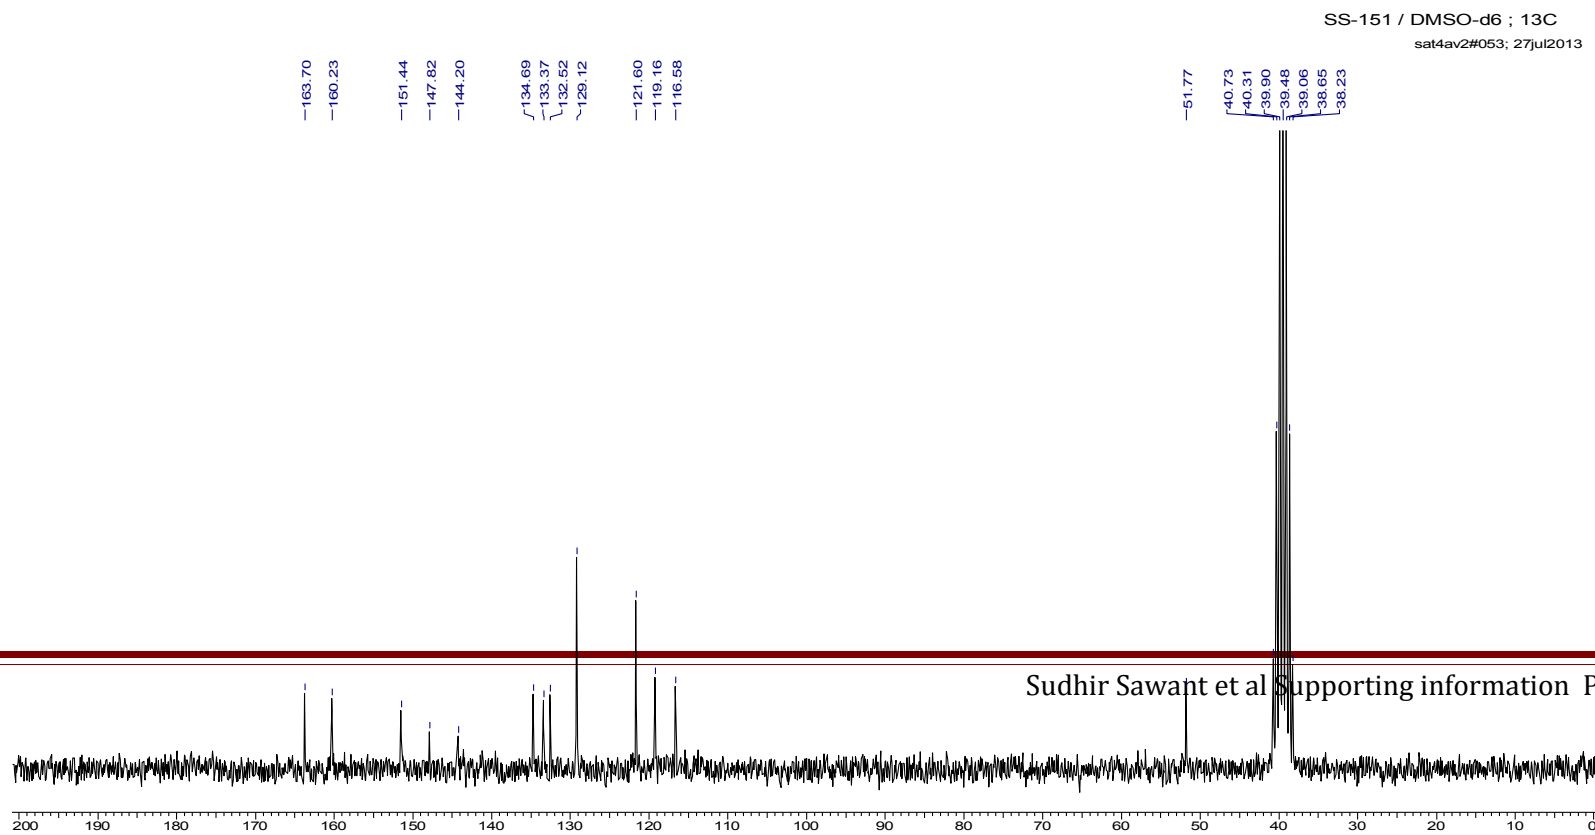



Figure S11  $^{13}\text{C}$  NMR spectrum of  $[\text{Zn}(\text{TMPIMP})_2] \cdot 2\text{H}_2\text{O}$

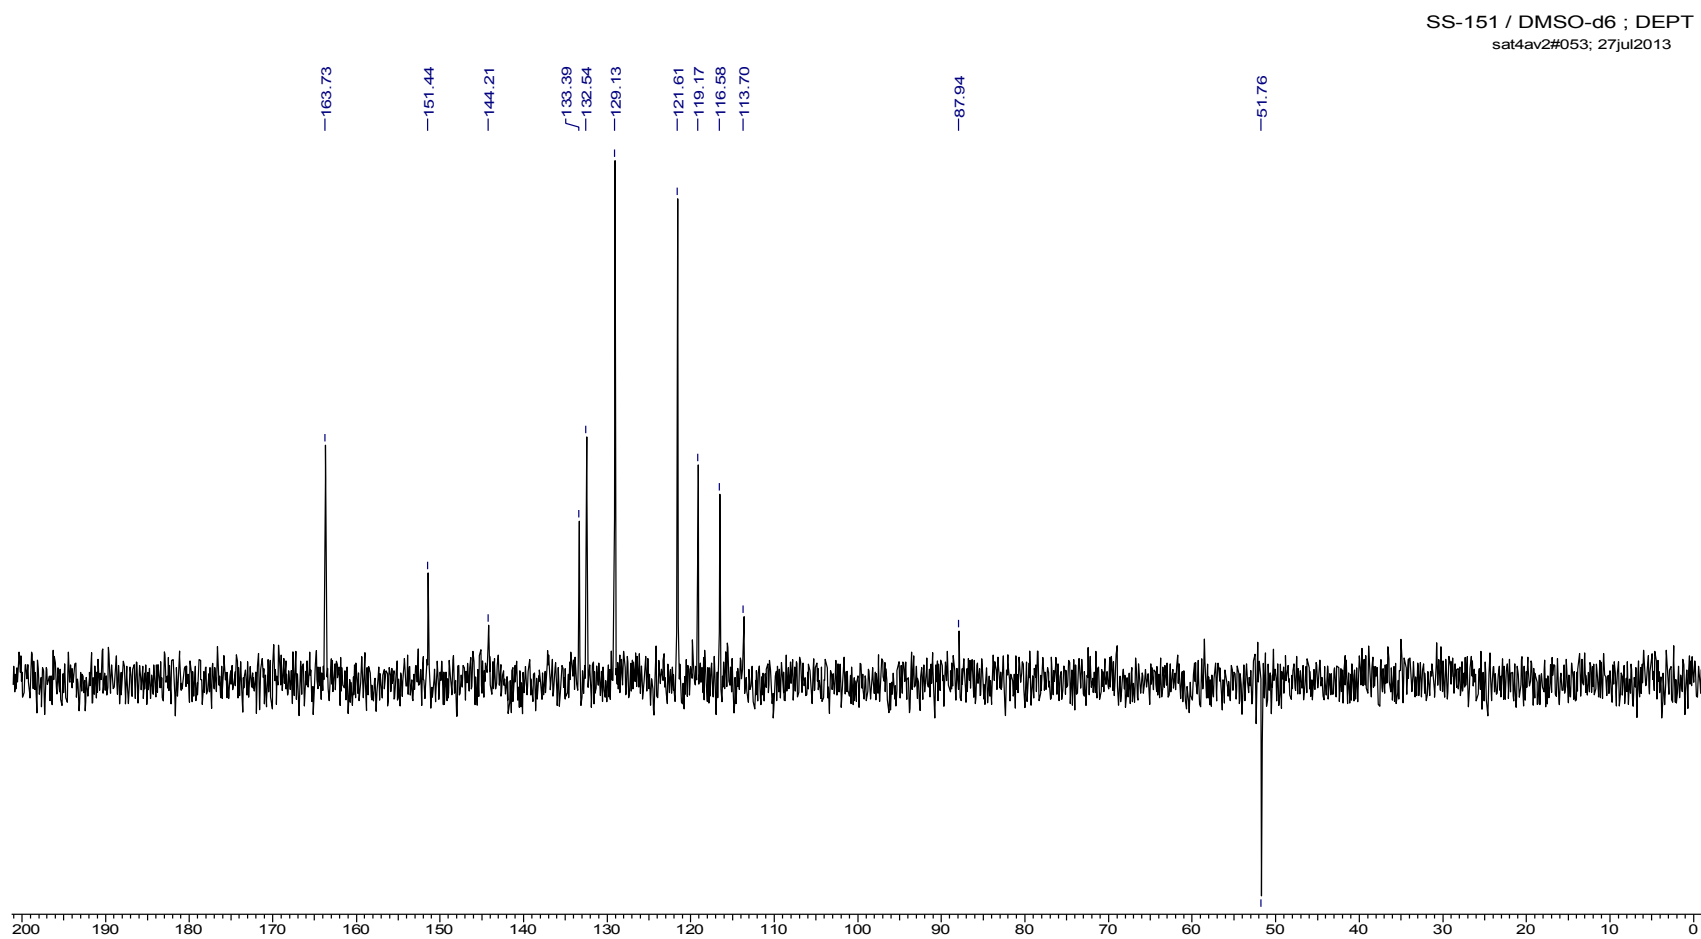

Figure S12  $^{13}\text{C}$  NMR DEPT spectrum of  $[\text{Zn}(\text{TMPIMP})_2] \cdot 2\text{H}_2\text{O}$

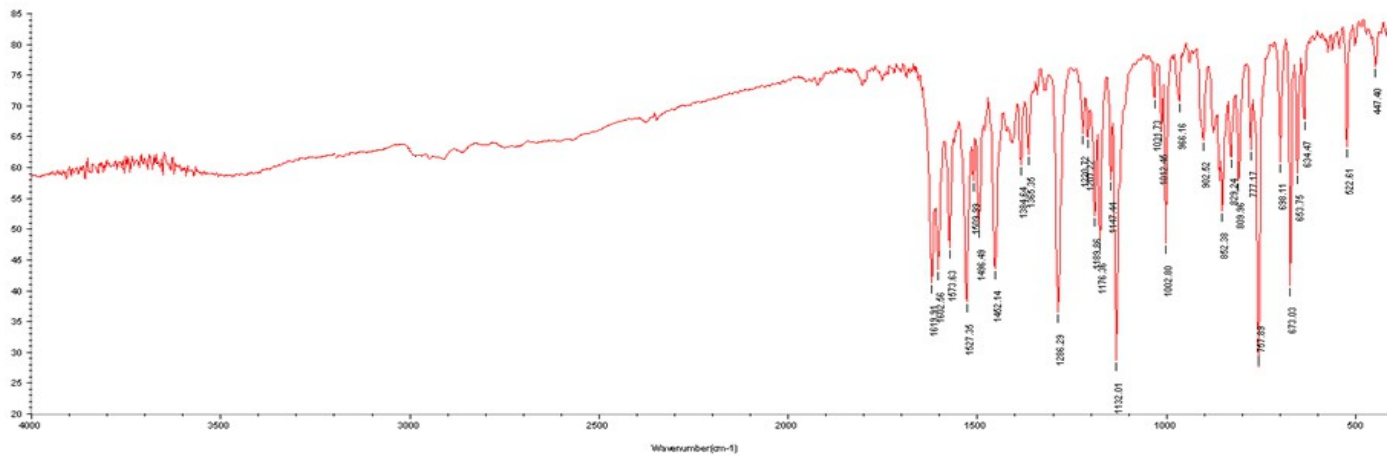

Figure S13 IR spectrum of  $[\text{Zn}(\text{TMPIMP})_2] \cdot 2\text{H}_2\text{O}$

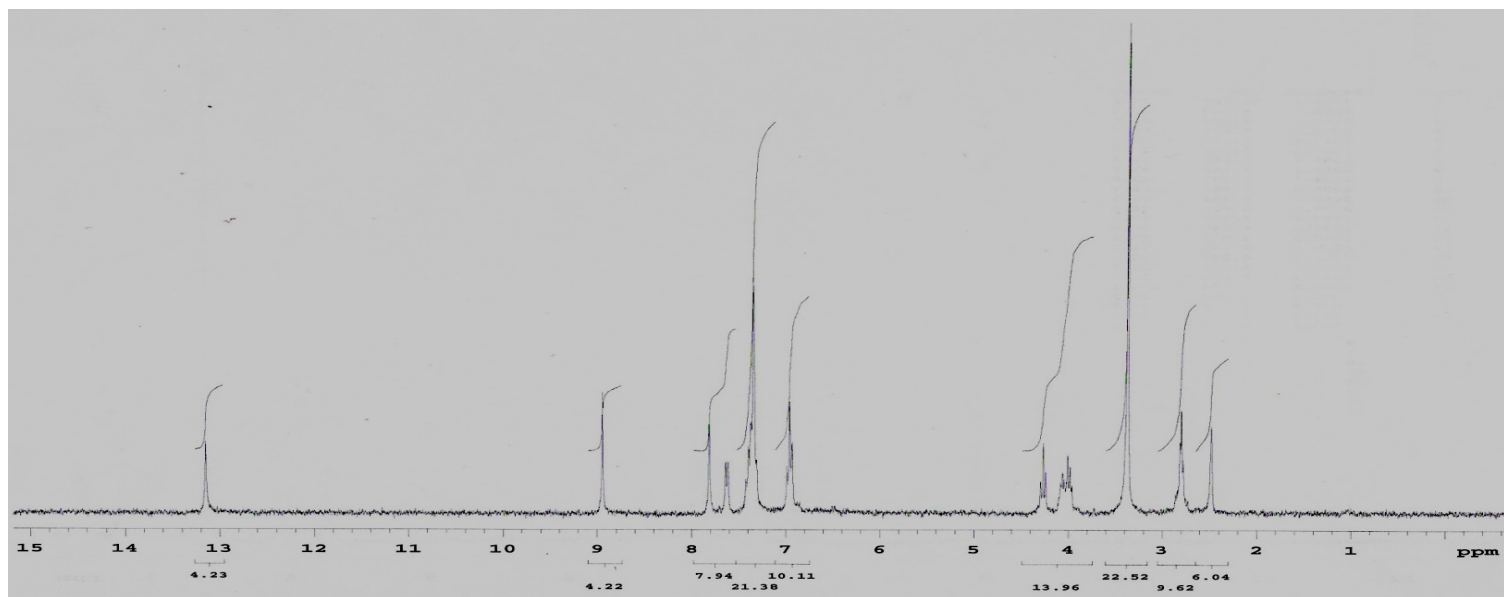

Figure S14  $^1\text{H}$  NMR Spectrum of Schiff base HBABO

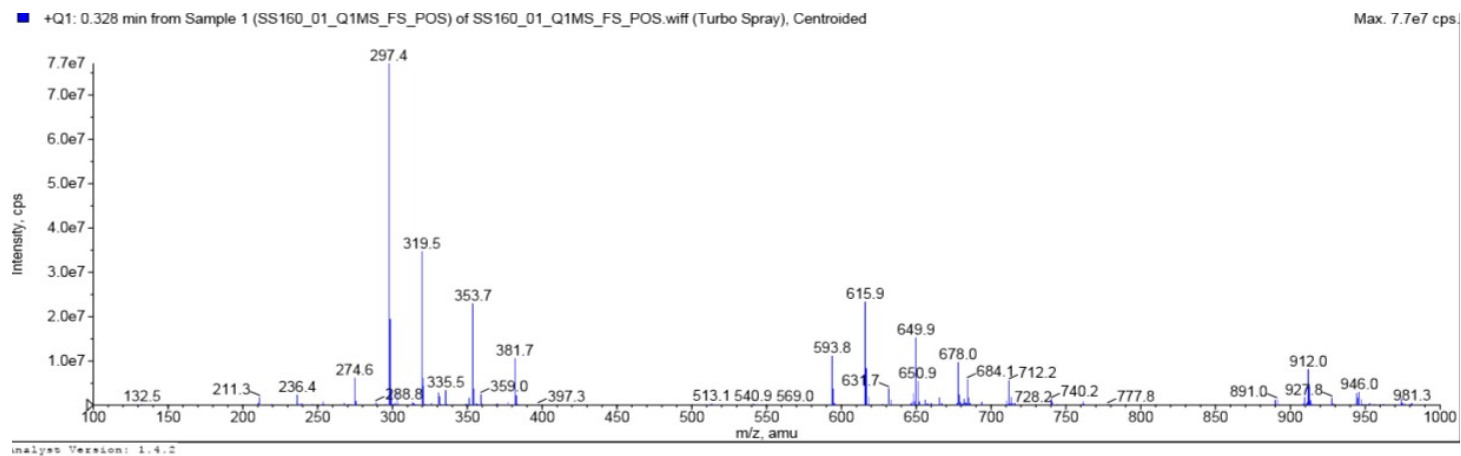

Figure S15 MS Spectrum of HBABO Schiff base

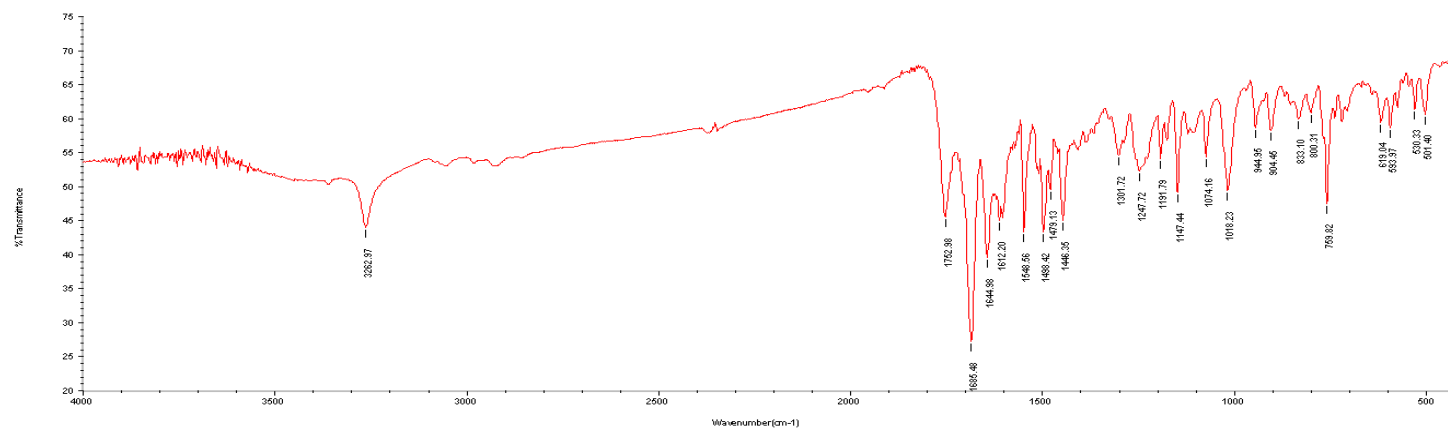

Figure S16 IR Spectrum of HBABO Schiff base

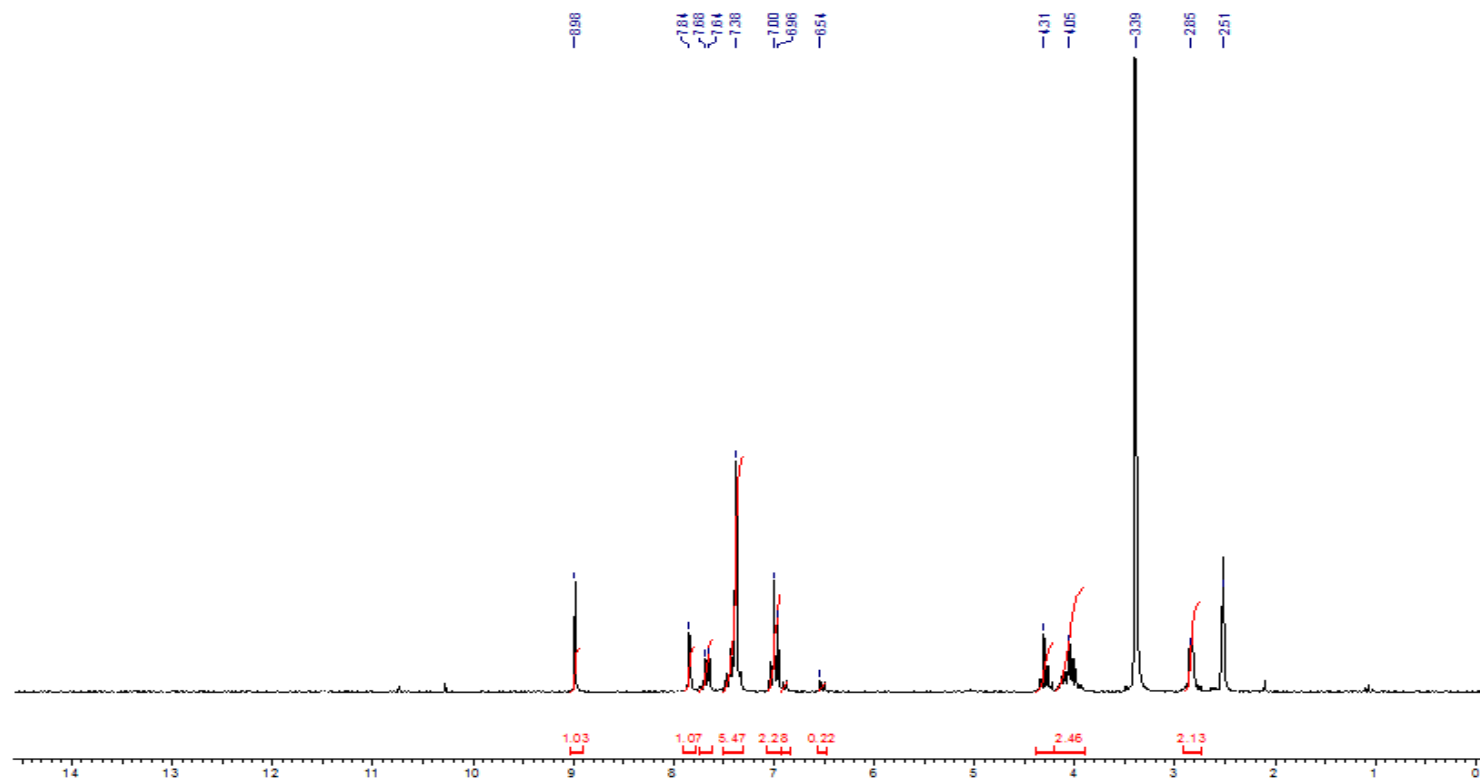

Figure S17 <sup>1</sup>H NMR Spectrum of Zn(HBABO)<sub>2</sub>·2H<sub>2</sub>O

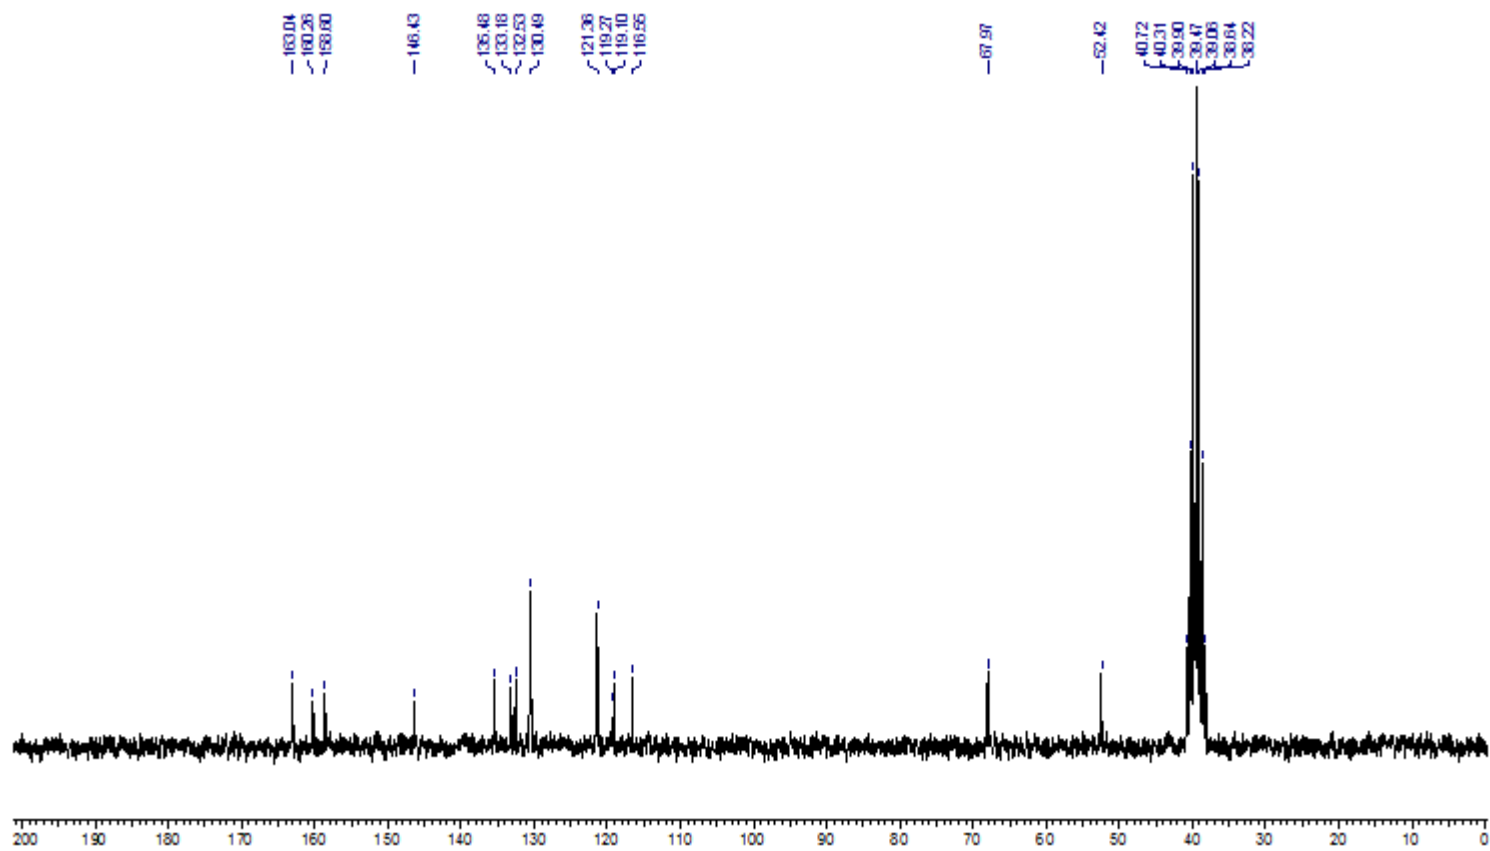

Figure S18 <sup>13</sup>C NMR Spectrum of Zn(HBABO)<sub>2</sub>·2H<sub>2</sub>O

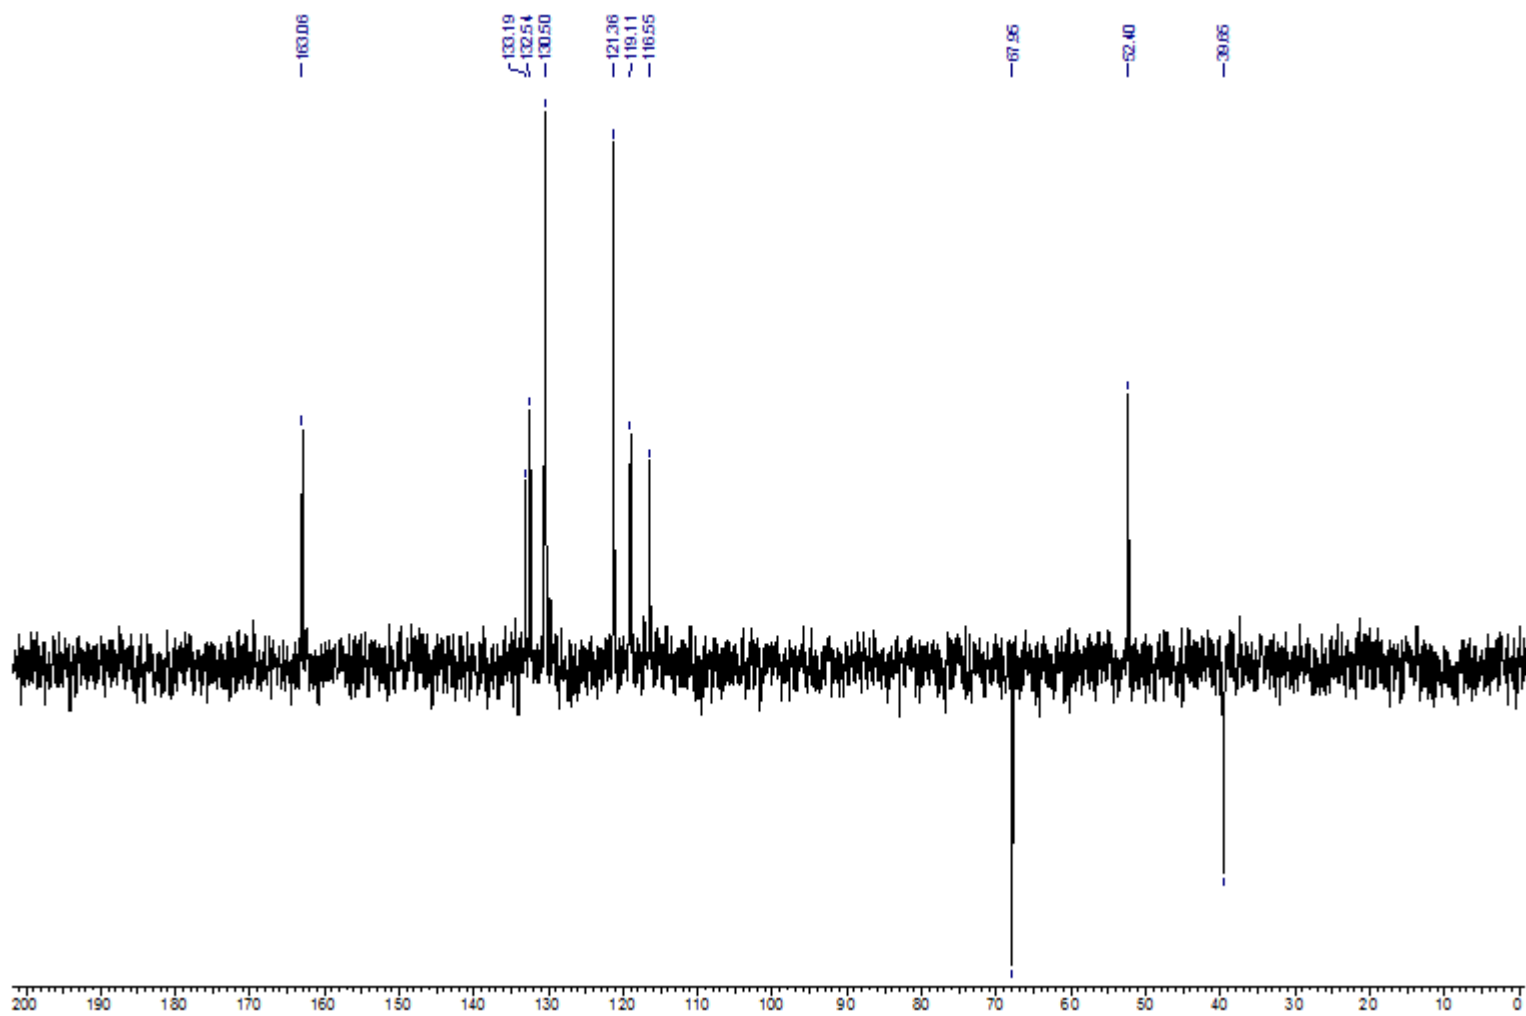

Figure S19  $^{13}\text{C}$  NMR DEPT Spectrum of  $\text{Zn}(\text{HBABO})_2 \cdot 2\text{H}_2\text{O}$

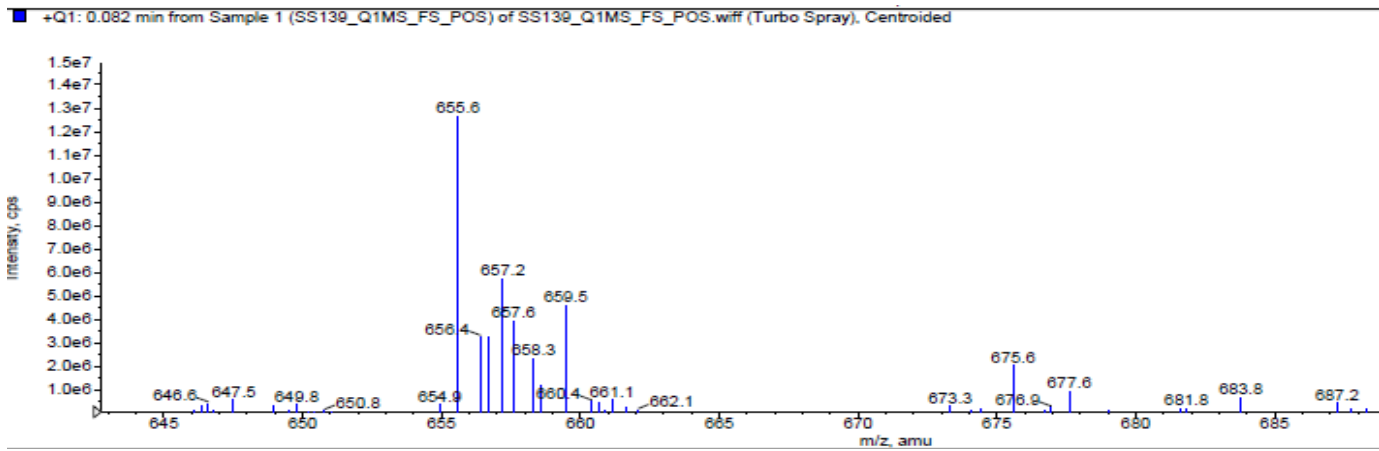

Figure S20 MS Spectrum of  $\text{Zn}(\text{HBABO})_2 \cdot 2\text{H}_2\text{O}$

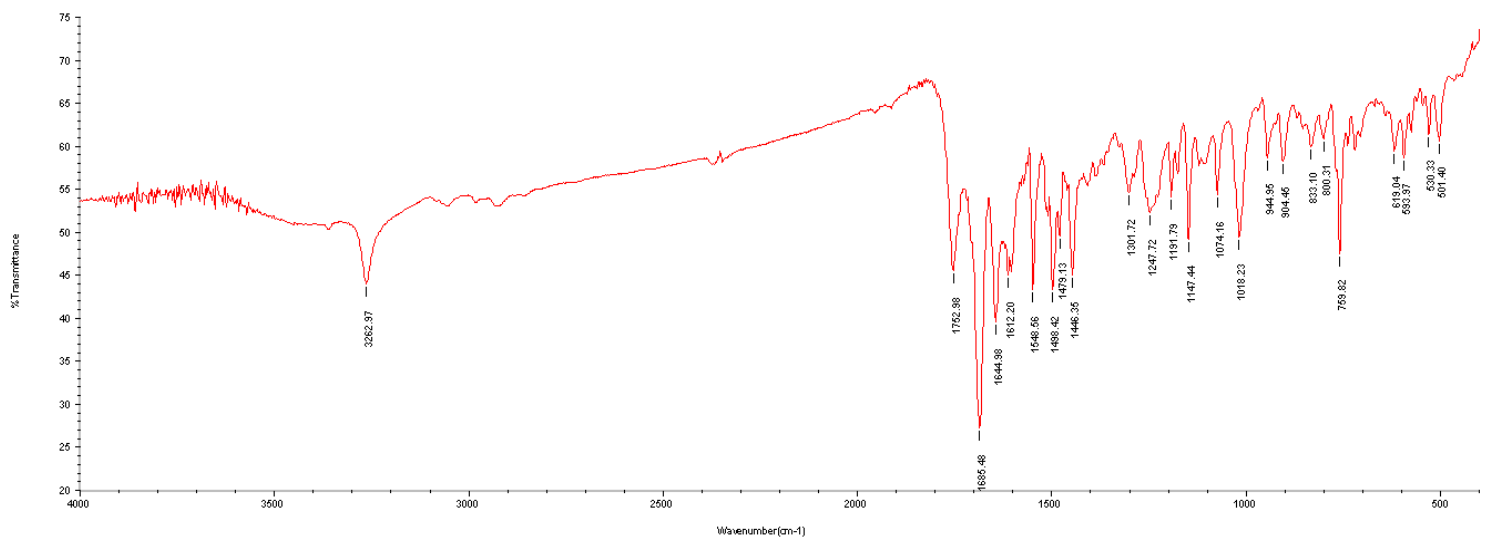

Figure S21 IR Spectrum of  $\text{Zn}(\text{HBABO})_2 \cdot 2\text{H}_2\text{O}$

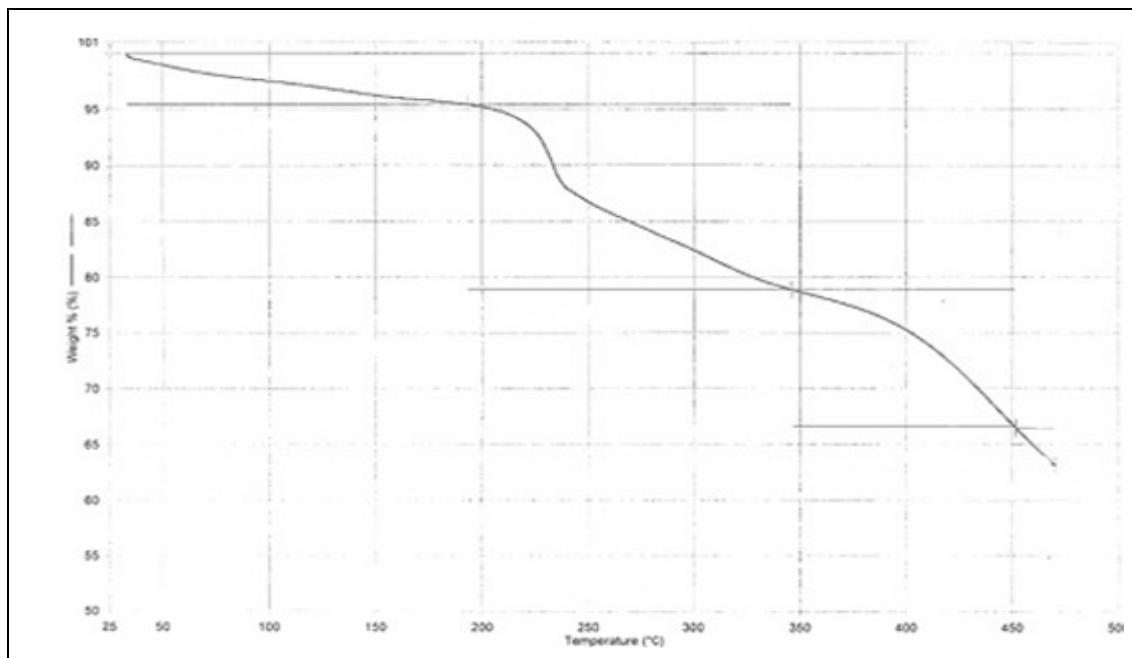

Figure S22 TGA graph of Zn(NMAPIMHMC)<sub>2</sub>·2H<sub>2</sub>O



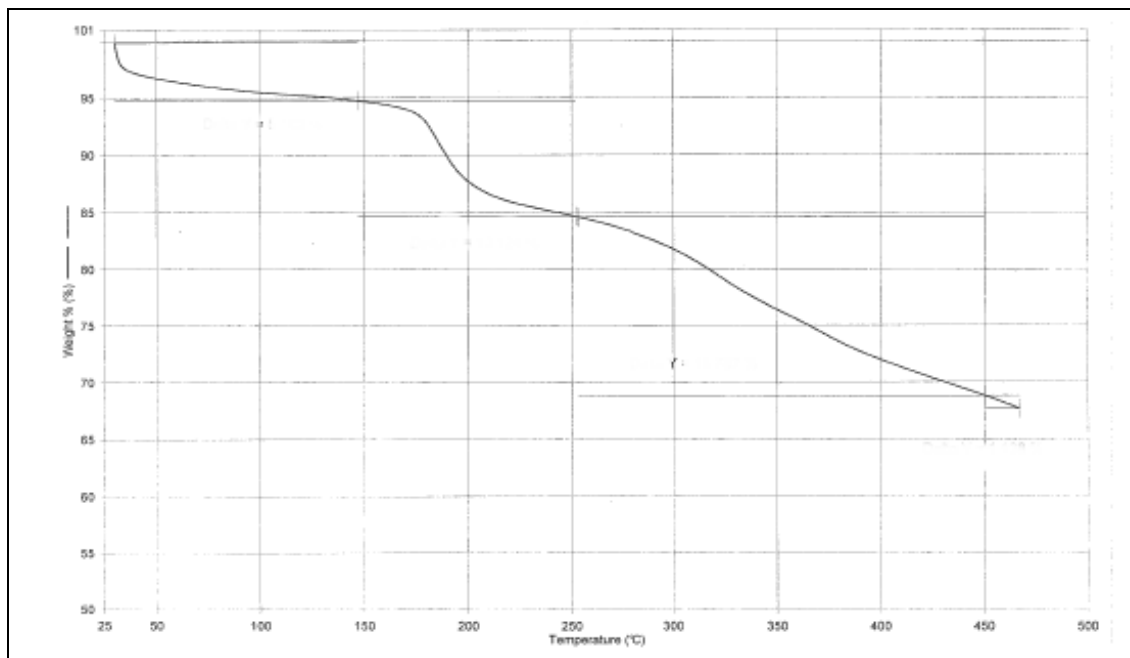

Figure S23 TGA graph of Zn(TMPIMP)<sub>2</sub>·2H<sub>2</sub>O

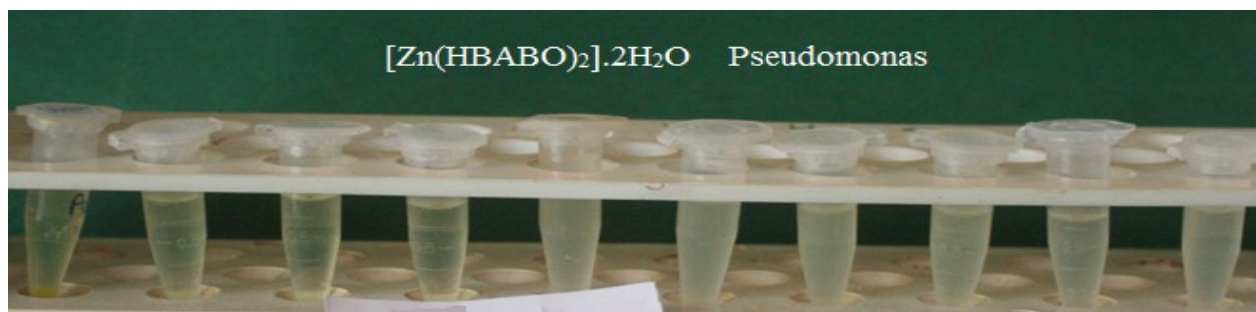

Figure S24 Antibacterial activity of [Zn(HBABO)<sub>2</sub>].2H<sub>2</sub>O against *Pseudomonas*

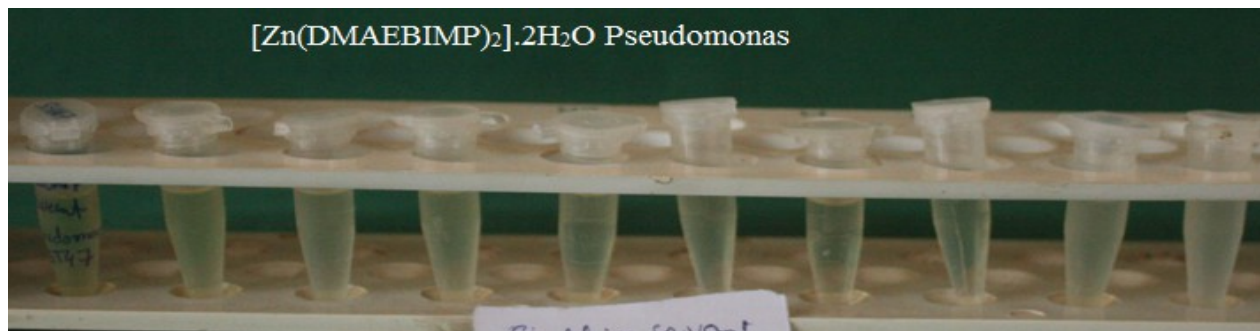

Figure S25 Antibacterial activity of  $[\text{Zn}(\text{DMAEBIMP})_2] \cdot 2\text{H}_2\text{O}$  against *Pseudomonas*

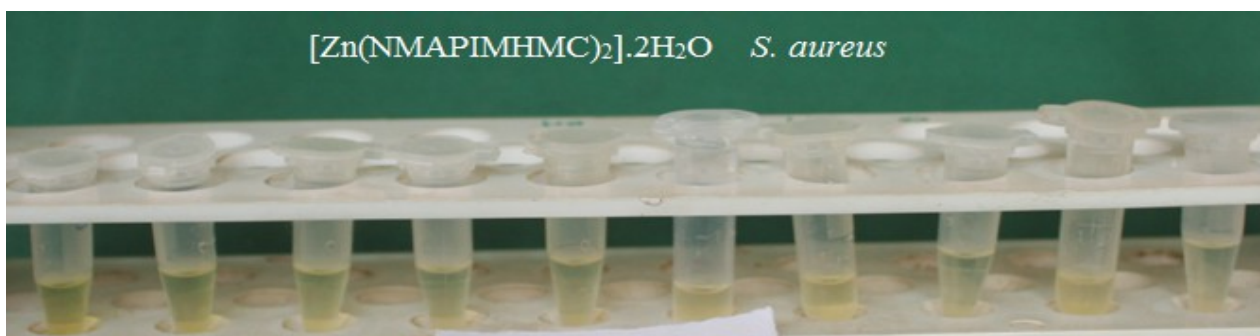

Figure S26 Antibacterial activity of  $[\text{Zn}(\text{NMAPIMHMC})_2] \cdot 2\text{H}_2\text{O}$  against *S. aureus*

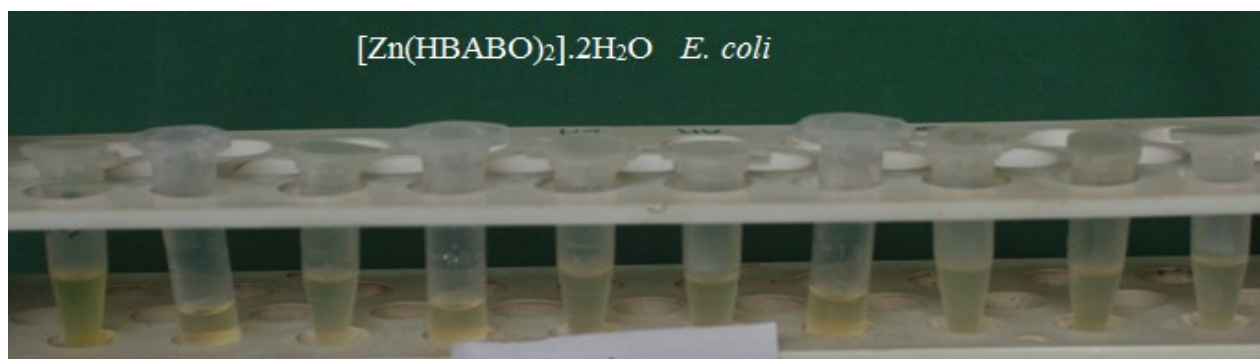

Figure S27 Antibacterial activity of  $[\text{Zn}(\text{HBABO})_2] \cdot 2\text{H}_2\text{O}$  against *E. coli*

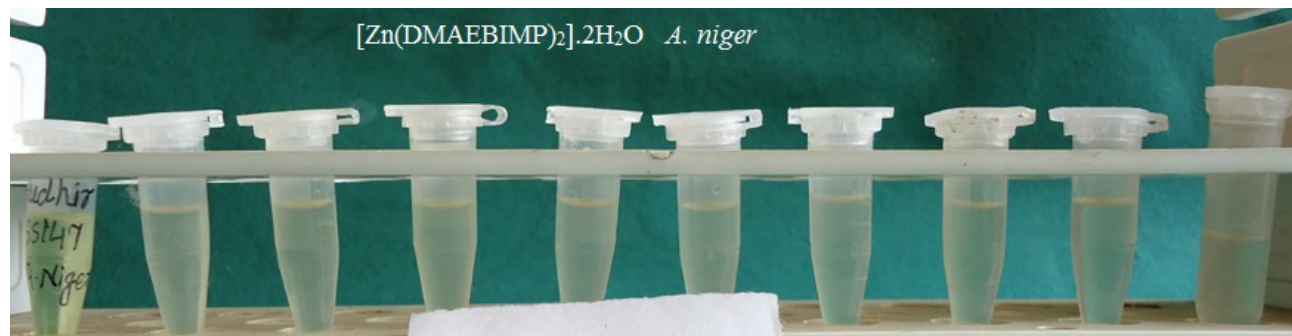

Figure S28 Antifungal activity of [Zn(DMAEBIMP)<sub>2</sub>].2H<sub>2</sub>O against *A. niger*

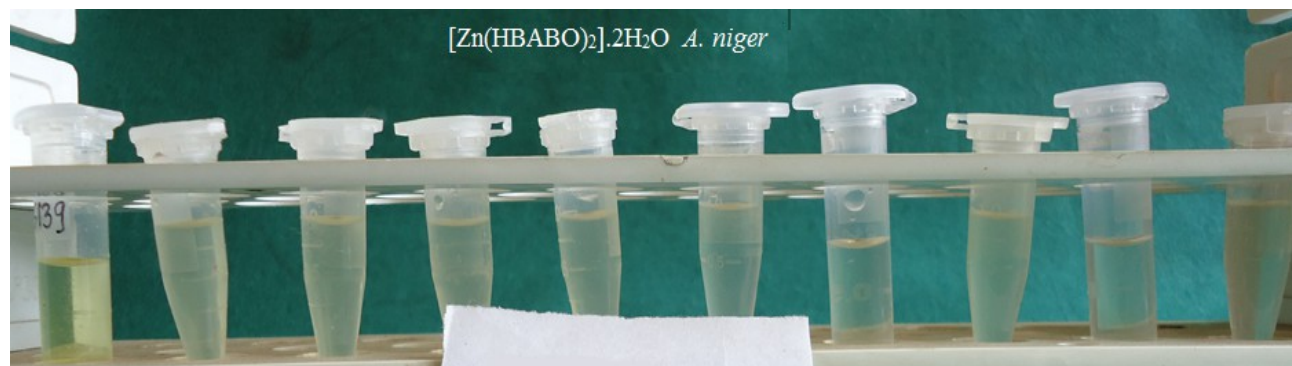

Figure S29 Antifungal activity of [Zn(HBABO)<sub>2</sub>].2H<sub>2</sub>O against *A. niger*

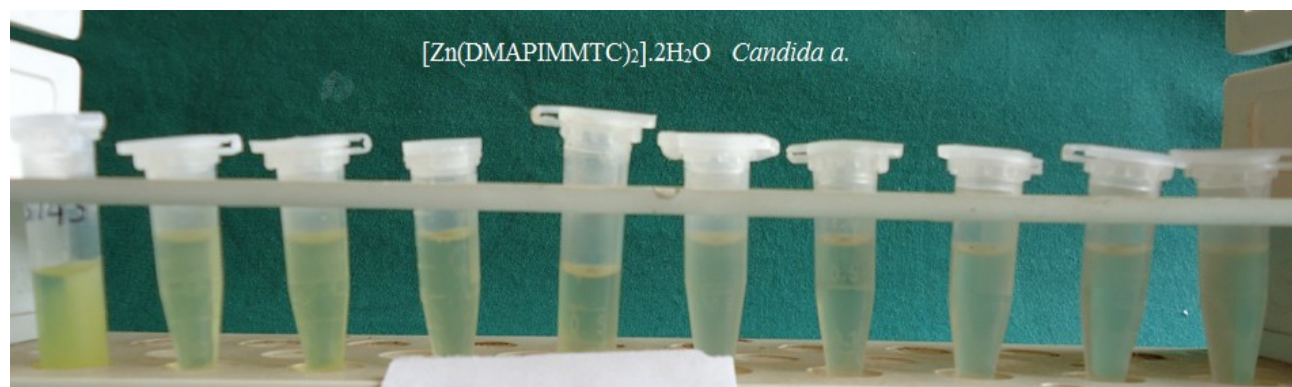

Figure S30 Antifungal activity of [Zn(DMAPIMMTC)<sub>2</sub>].2H<sub>2</sub>O against *Candida a.*
